# Supplementary material
Source: PubMed Central journal article supplement (PMC2384142)
Supplement: blood_blood-2007-09-111567_2.pdf [file blood_blood-2007-09-111567_2.pdf]

| Genes    | Species | Primers forward (5'-3') | Primers reverse (5'-3') | Size (bp) | Accession #  |
|----------|---------|-------------------------|-------------------------|-----------|--------------|
| GDF5     | H       | TGTCCGATGCTGACAGAAAGG   | AGAGCGGGCCTTAATCTCAT    | 548       | NM_000557    |
|          | M       |                         |                         |           | NM_008109    |
| GDF6     | H       | CCGTTGACGCATCTTGATTTGG  | CCTGATGGGACTCCTTCTACTTC | 645       | NM_001001557 |
| ALK2     | H       | ACGATGGCTTCCACGTCTACCAG | ACAGTGTAATCTGGCGAGCCAC  | 488       | NM_001105    |
| ALK3     | H       | TGCTATTGCTCAGGGCACTGTC  | TCGGCCTTTACCAACTTGCCG   | 552       | NM_004329    |
| ALK6     | H       | AGTGTCGGGACACTCCCATTC   | TGAACCAGCTGGCTTCCTCTGTG | 492       | NM_001203    |
| Neogenin | H       | TGCTCCATACTCCAGTGC      | GGTGAGTCAGTCTGTTTCCCAC  | 527       | NM_002499    |
|          | M       |                         |                         |           | NM_008684    |

H, Human; M, Mouse
