# Supplementary material
Source: PubMed Central journal article supplement (PMC2384142)
Supplement: blood_blood-2007-09-111567_3.pdf [file blood_blood-2007-09-111567_3.pdf]

| Genes      | Sequences (sense)      | Accession # |
|------------|------------------------|-------------|
| ALK2       | CCCAACUUGCCAAAAUGUUt   | NM_001105   |
| ALK3       | GGAUACCUUGCCUUUUUUUAtt | NM_004329   |
| ALK6       | GAUCAAUUGAAUGCUGCAct   | NM_001203   |
| Neogenin#1 | GGAAUGAGACCAAAAAUGAtt  | NM_002499   |
| Neogenin#2 | GGAGAGAUGCAAGUAACCAAtt | NM_002499   |
| Neogenin#3 | GCUCAUAGUAGCAGGUCUUt   | NM_002499   |
