# Supplementary material
Source: PubMed Central journal article supplement (PMC2384142)
Supplement: blood_blood-2007-09-111567_4.pdf [file blood_blood-2007-09-111567_4.pdf]

| Genes    | Species | Primers forward (5'-3')  | Primers reverse (5'-3') | Size (bp) | Accession # |
|----------|---------|--------------------------|-------------------------|-----------|-------------|
| ALK2     | H       | CCACTTGGAGGTTGGCCTCATT   | GACCAGAGCCACTTCCTGATGT  | 176       | NM_001105   |
| ALK3     | H       | GCTATGATCATCTTCTCCAGCTGC | TGGCAATAGTTCGCTGAACCAA  | 198       | NM_004329   |
| ALK6     | H       | CTCAGAGCTCAGGAAGTGGATCA  | GGCTTCCTCTGTGGTGAAGAAC  | 170       | NM_001203   |
| Neogenin | H       | GGAGTATGACAGCCCATGGGA    | TTCAGAGGGAGGCTGCCAATTC  | 125       | NM_002499   |

H, human; M, Mouse
